# Supplementary material
Source: PubMed Central journal article supplement (PMC6318124)

# Supplementary Figure 1

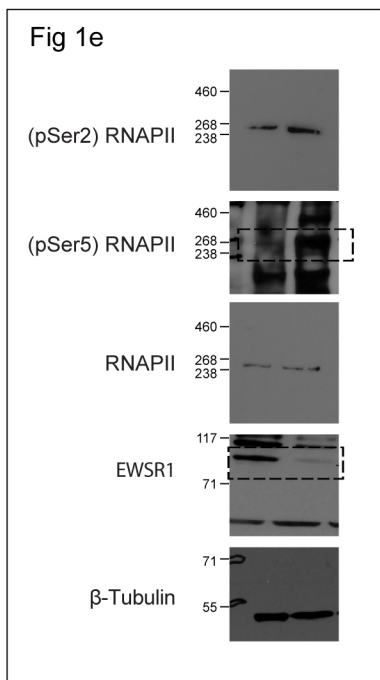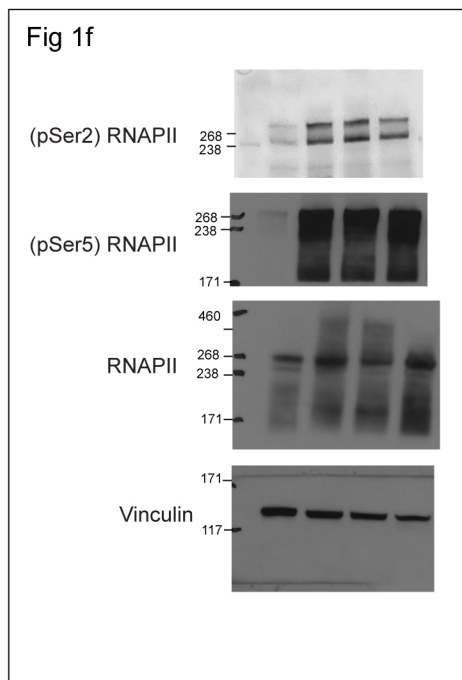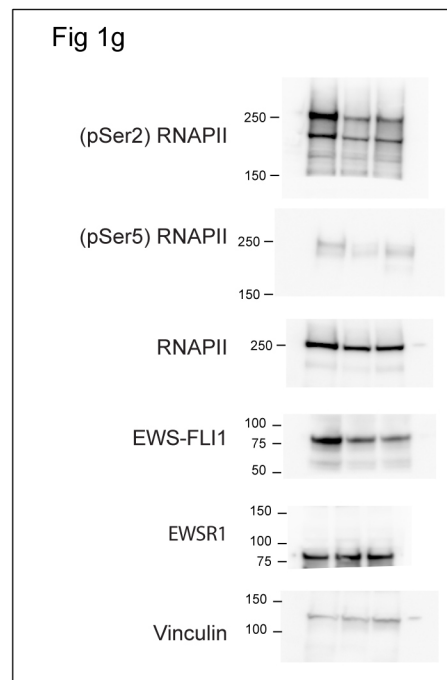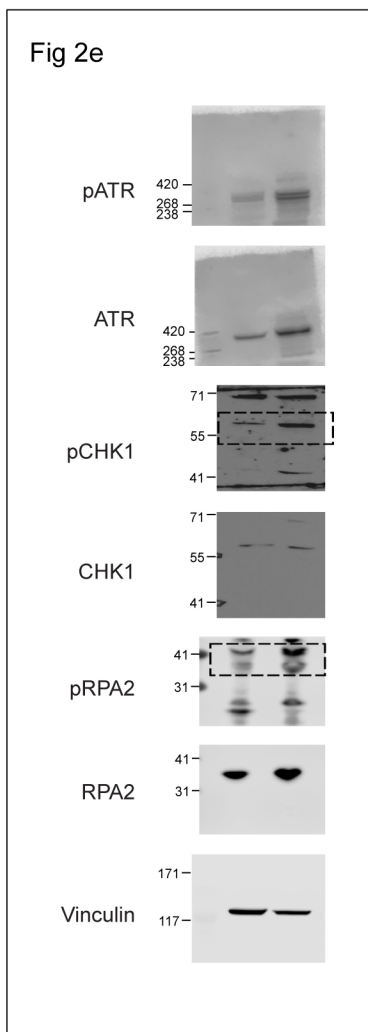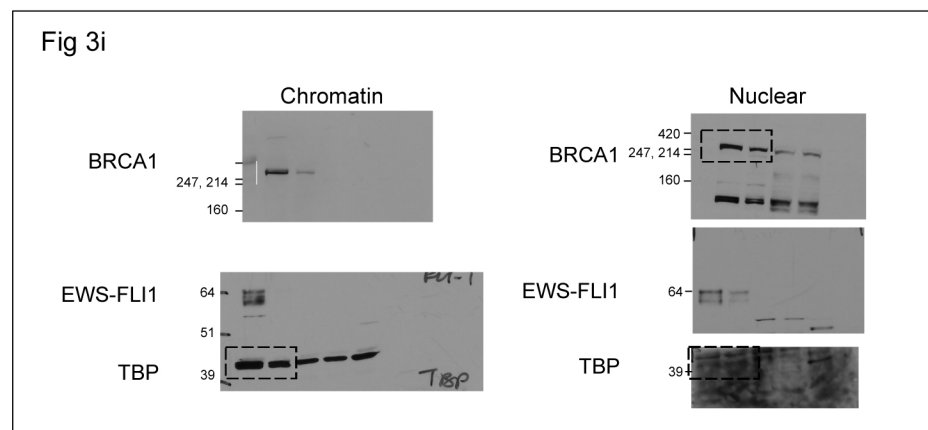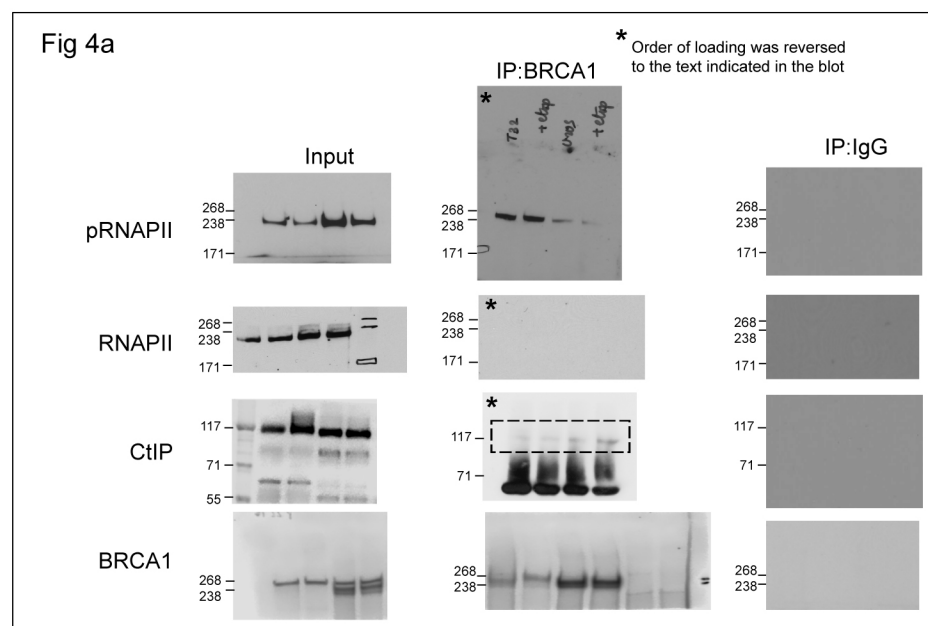

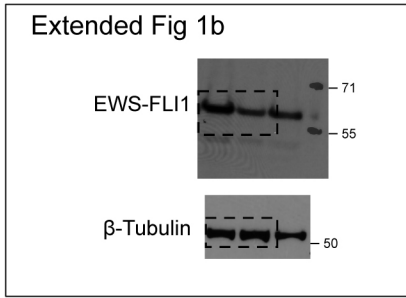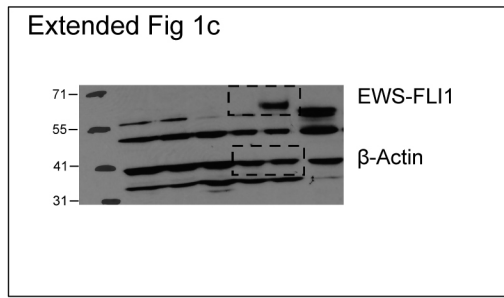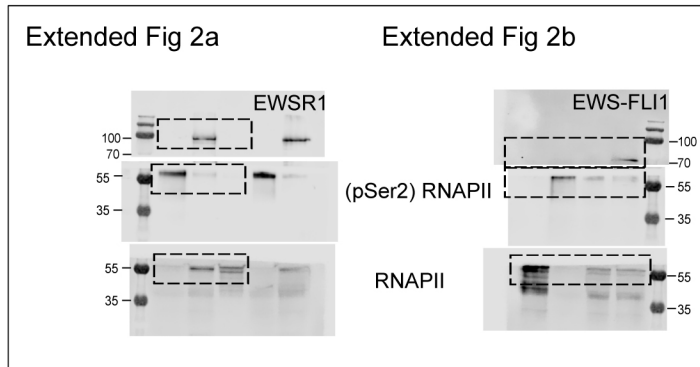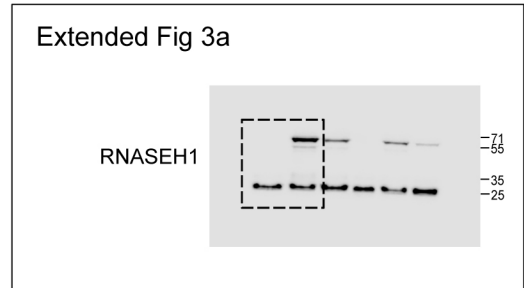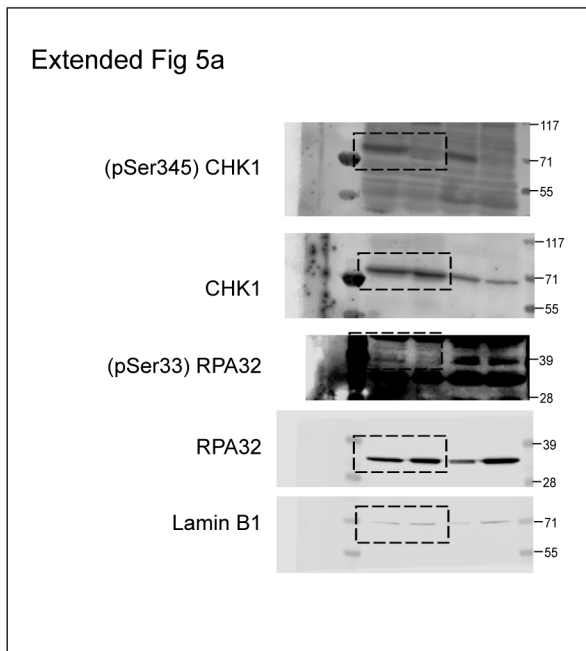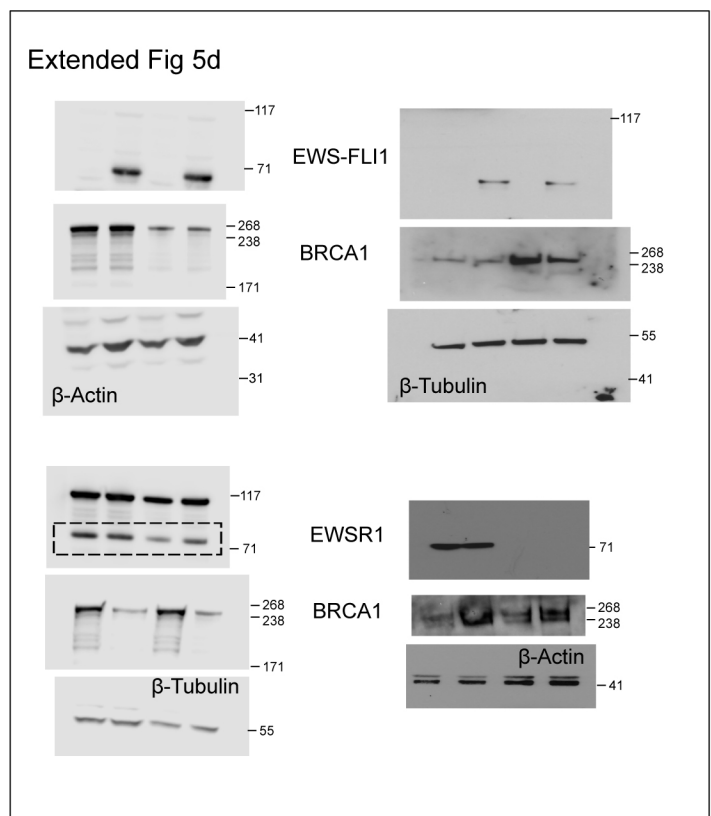

Extended Fig 6d

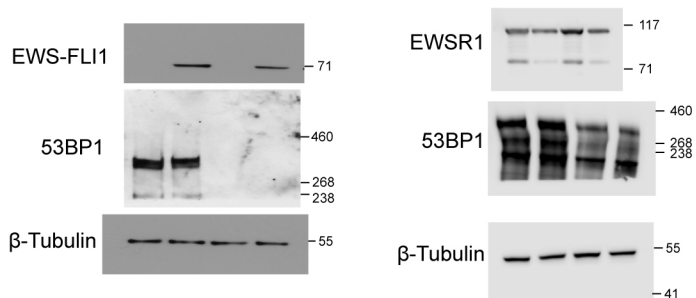

Extended Fig 6e

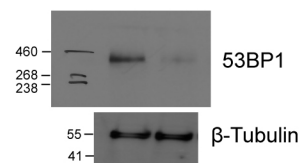

Extended Fig 6f

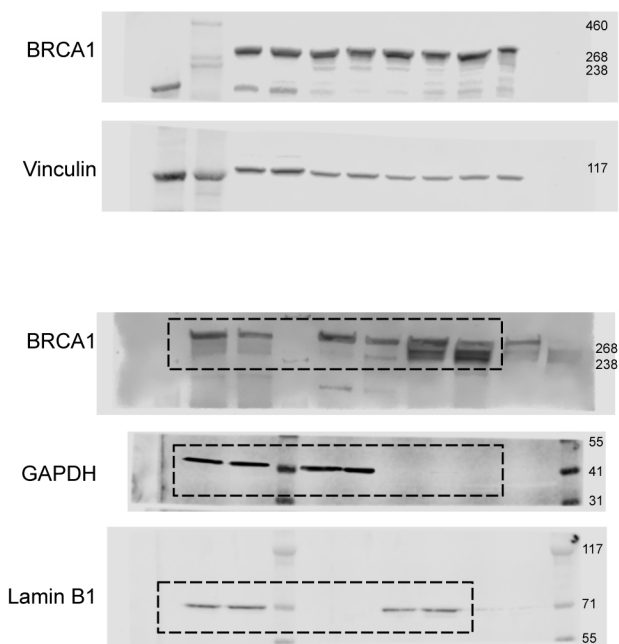

Extended Fig 6g

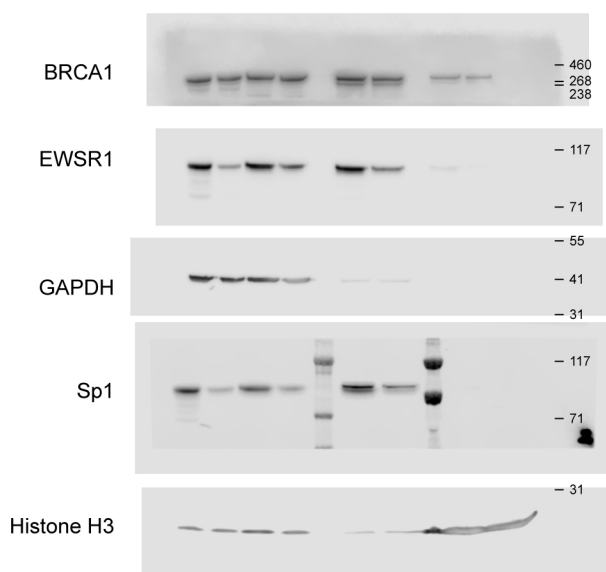

Extended Fig 7a

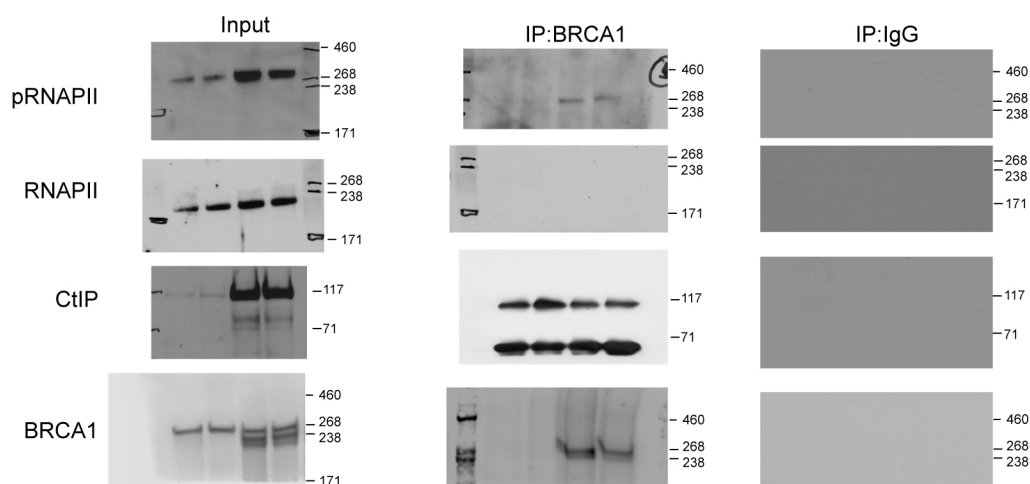

Supplement: NIHMS968894-supplement-supplemental_data_figures_ED1-10.pdf [file NIHMS968894-supplement-supplemental_data_figures_ED1-10.pdf]
